# Supplementary material for: The predictive value of nontraditional lipid parameters for intracranial and extracranial atherosclerotic stenosis: a hospital-based observational study in China
Source: Springer Nature journal article supplement (doi:10.1186/s12944-022-01761-4), 2023-01-28

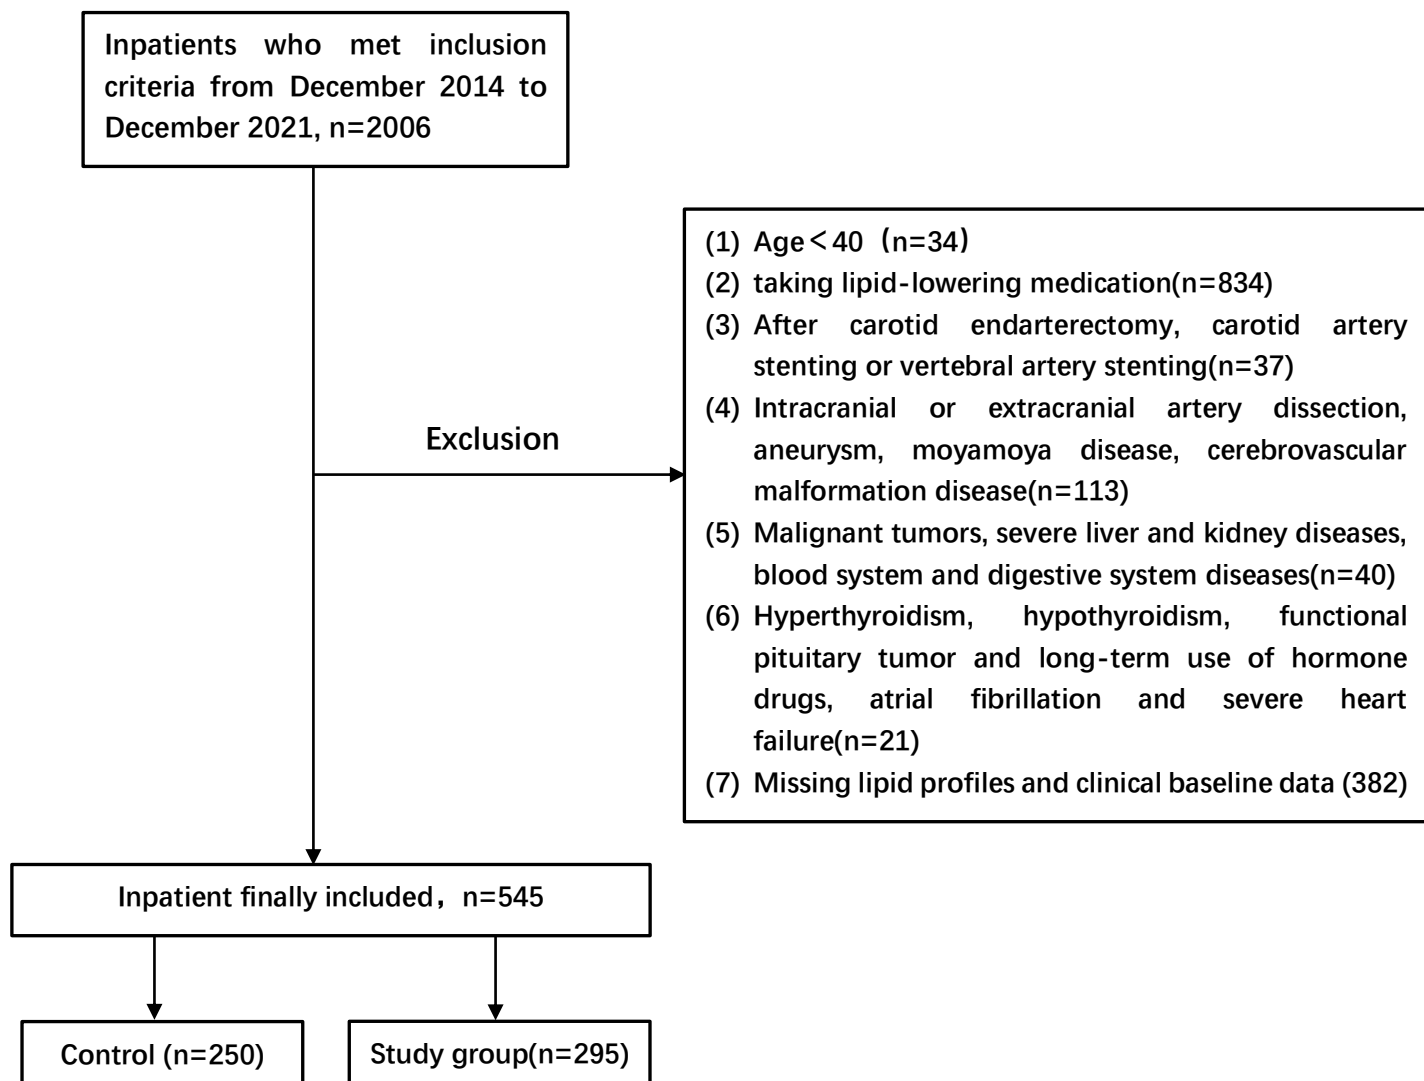

Supplement: MOESM1 [file 12944_2022_1761_MOESM1_ESM.pdf]
